# Supplementary material
Source: PubMed Central journal article supplement (PMC4165404)
Supplement: NIHMS626553-supplement-Supplementary_data.pdf [file NIHMS626553-supplement-Supplementary_data.pdf]

Supplementary Materials for  
**Intronic *miR-3151* Within *BAALC* Drives Leukemogenesis by  
Deregulating the TP53 Pathway**

Ann-Kathrin Eisfeld, Sebastian Schwind, Ravi Patel, Xiaomeng Huang,  
Ramasamy Santhanam, Christopher J. Walker, Joseph Markowitz, Kevin W. Hoag, Tiina  
M. Jarvinen, Benjamin Leffel, Danilo Perrotti, William E. Carson III, Guido Marcucci,  
Clara D. Bloomfield, Albert de la Chapelle\*

\*Corresponding author. E-mail: albert.delachapelle@osumc.edu

Published 15 April 2014, *Sci. Signal.* **7**, ra36 (2014)

DOI: 10.1126/scisignal.2004762

**The PDF file includes:**

Fig. S1. Effects of miR-3151 on TP53 abundance in three AML patients.

Fig. S2. The abundance of miR-3151 regulates caspase 3 cleavage.

Fig. S3. Flow cytometric determination of CD45 abundance in the peripheral blood of NSG mice.

Fig. S4. Confirmation of effective knockdown of SP1, NF- $\kappa$ B, and TP53.

Table S1. Predicted transcription factor bindings to TSS-*3151* and TSS-*BAALC*.

Table S2. Primer sequences for overexpression constructs.

Table S3. Primer sequences for luciferase constructs.

Table S4. Oligonucleotide sequences for EMSAs.

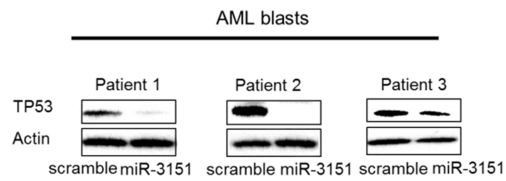

**Fig. S1. Effects of miR-3151 on TP53 abundance in three AML patients.**

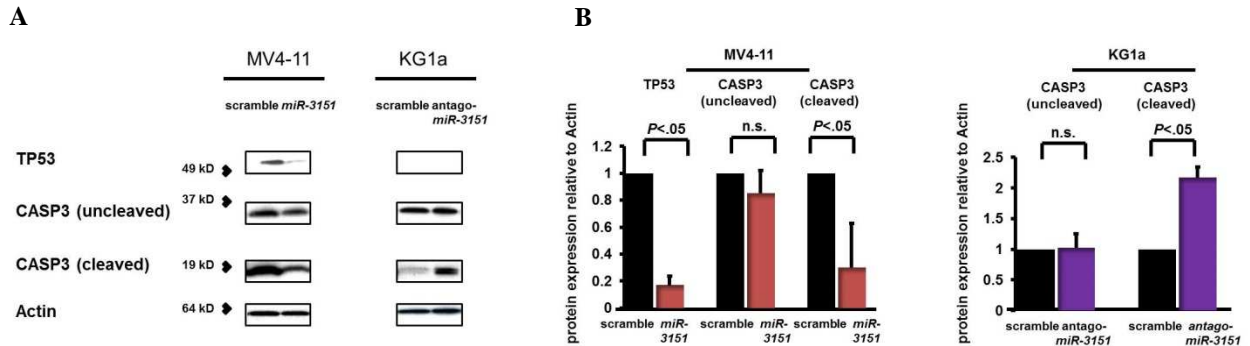

**Fig. S2. The abundance of miR-3151 regulates caspase 3 cleavage.** (A) Representative Western blots of MV4-11 cells stably expressing miR-3151 and of KG1a cells stably expressing antago-miR-3151. The abundance of TP53 and of cleaved and uncleaved caspase 3 (CASP3) are shown. (B) The bar graphs depict the change in protein abundance normalized to the amount of actin and relative to the amount of the indicated protein in the scramble control cells as determined by densitometry (n=3 blots, data are shown as mean  $\pm$  s.d., P-values determined from 1-tailed student's t-test).

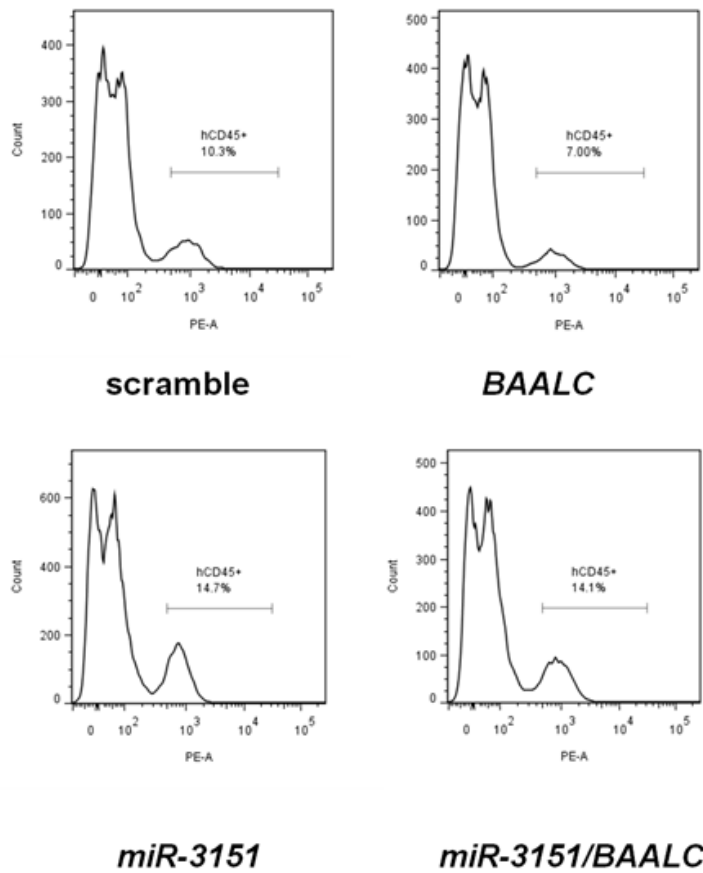

**Fig. S3. Flow cytometric determination of CD45 abundance in the peripheral blood of NSG mice.** To verify successful engraftment of the injected cells, one mouse in each group of four was bled 37 days after injection and the presence of CD45, indicator of human cells (MV4-11), was detected by FACS.

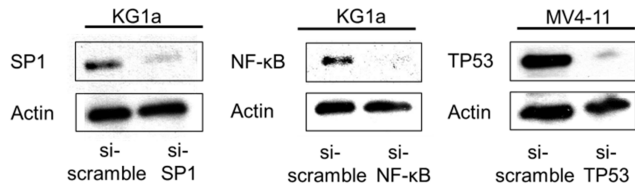

**Fig. S4. Confirmation of effective knockdown of SP1, NF-κB, and TP53.**

**Table S1. Predicted transcription factor bindings to TSS-3151 and TSS-BAALC.** Listed are leukemia-relevant transcription factors predicted to bind to TSS-3151 and TSS-BAALC using the algorithm provided at TFsearch.org. A higher score indicates a higher binding probability.

| <b>Transcription factor</b> | <b>Score TSS-3151</b>                   | <b>Score TSS-BAALC</b>                 |
|-----------------------------|-----------------------------------------|----------------------------------------|
| GATA-2                      | 90.9 (no binding in pilot experiment)   | 91.7 (no binding in pilot experiment)  |
| SP1                         | 90.4                                    | 82.2                                   |
| RUNX1                       | 87.4                                    | 88.7                                   |
| GATA-1                      | 87.3 (restricted to erythroid lineage)  | 84.5 (restricted to erythroid lineage) |
| IK-2                        | 85.1 (no binding in pilot experiment)   | Not predicted                          |
| MZF-1                       | 84.3 (no binding in pilot experiment)   | 74.8 (no binding in pilot experiment)  |
| NF-κB                       | 84.1 (+8bp downstream of 50bp TSS-3151) | 74.2                                   |

**Table S2: Primer sequences for overexpression constructs.**

| Primer name                    | Sequence                          | Annealing temperature |
|--------------------------------|-----------------------------------|-----------------------|
| TP53 ORF clon F (NheI)         | gcgtgctagccATGGAGGAGCCGCAGTCAG    | 64C                   |
| TP53 ORF clon R (BamHI)        | gcgtggatccTCAGTCTGAGTCAG          |                       |
| SP1 ORF clon F (NheI)          | gcgtgctagcCACCATGAGCGACCAAGATC    | 60C                   |
| SP1 ORF clon R (XhoI)          | gcgtctcgagTCTCAGAAGCCATTGCCACTG   |                       |
| miR-3151 stemloop cloning F    | gcgtgctagcTGCAACAACCTTTGGACTAG    | 58C                   |
| miR-3151 stemloop cloning R    | gcgtggatccATCACAGGTGGTGTACTAG     |                       |
| RUNX1 ORF clon F (NheI)        | gcaggctagcAGGAAGCGATGGCTTCAGAC    | 60C                   |
| RUNX1 ORF clon R (EcoRI)       | cgtcgaattcCGCCTCAGTAGGGCCTCCAC    |                       |
| BAALC 1-6-8 ORF clon R (NheI)  | gcgtgctagcGGATGGGCTGCGGCGGGAG     | 58C                   |
| BAALC 1-6-8 ORF clon R (BamHI) | gcgtggatccGTTGACACAGTTCTTTGTGATTC |                       |

**Table S3: Primer sequences for luciferase constructs.** In *miR-3151*, the SP1 and RUNX1 consensus sites are overlapping, so only a single set of mutant primers was necessary. In *BAALC*, each transcription factor binding sites was mutated separately thus the need for two sets of mutant primers.

| Primer name                                     | Sequence                               | Annealing temperature |
|-------------------------------------------------|----------------------------------------|-----------------------|
| TP53 miR-3151F (EcoRI; +1 bp of stop codon )    | cgtcgaattcCATTCTCCACTTCTTGTTTC         | 56C                   |
| TP53 miR-3151mut F (EcoRI; +1 bp of stop codon) | cgtcgaattcCATTCTCCACTTCTTGggaCCCA      |                       |
| TP53 miR3151R (EcoRI; +100 bp of stop codon )   | cgtcgaattcCCTATTGCAAGCAAGGGTTC         |                       |
| TSS-3151 clon F (KpnI; -487 bp of stemloop)     | gcacggtaccGTAGTCAGAGCGGTGGGATG         | 58C                   |
| TSS-3151 clon R (SacI; -290 bp of stemloop)     | gtgcgagctcCAGAATGAGACAGACCTGAG         |                       |
| TSS-3151 mutF                                   | gcacggtaccAACACAGCTACGACCTCATG         | 52C                   |
| TSS-3151 mut R                                  | gcacgagctcGAGTTCCAAAaaaaAaaaaACTGCTCAC |                       |
| TSS-BAALC clon F (KpnI; -2132 bp of ATG)        | gcacggtaccCTTGCTCACTTGGTTTATAG         | 58C                   |
| TSS-BAALC clon R (SacI, -2005 bp of ATG)        | gtgcgagctcAGCTAGAGCTTGGTGAGCAC         |                       |
| TSS-BAALC mut F                                 | GCCCCAGGATAaaaaTCCACTTCACaaaACG        | 58C                   |
| TSS-BAALC mut R                                 | CGTtttGTGAAGTGGAttttTATCCTGGGGC        |                       |

**Table S4: Oligonucleotide sequences for EMSAs.**

| <b>Oligo name</b>           | <b>Sequence</b>                |
|-----------------------------|--------------------------------|
| BAALC promoter SP1 F EMSA   | 5'/5Biosg/CCAGGATACCCCTCCACTTC |
| BAALC promoter SP1 R EMSA   | 5'/5Biosg/GAAGTGGAGGGGTATCCTGG |
| miR3151 promoter SP1 F EMSA | 5'/5Biosg/GCAGTGGGGTGGGGTTTGGA |
| miR3151 promoter SP1 R EMSA | 5'/5Biosg/TCCAAACCCACCCCACTGC  |
| SP1 perfect match F EMSA    | 5'/5Biosg/GATCCGGGGCGTGGGGCCTG |
| SP1 perfect match R EMSA    | 5'/5Biosg/CAGTCCCCACGCCCGGATC  |
